# Supplementary material for: D-mannose reduces oxidative stress, inhibits inflammation, and increases treg cell proportions in mice with ulcerative colitis
Source: PubMed Central journal article supplement (PMC11563948; doi:10.3389/fphar.2024.1454713), 2024-11-01

Legends: N=sham control; M=TNBS-induced UC model; S=SASP treated group; D=D-mannose treated group.

**1. Figure 3-panel A: WB analysis of iNOS protein (left: iNOS; right: GAPDH)**

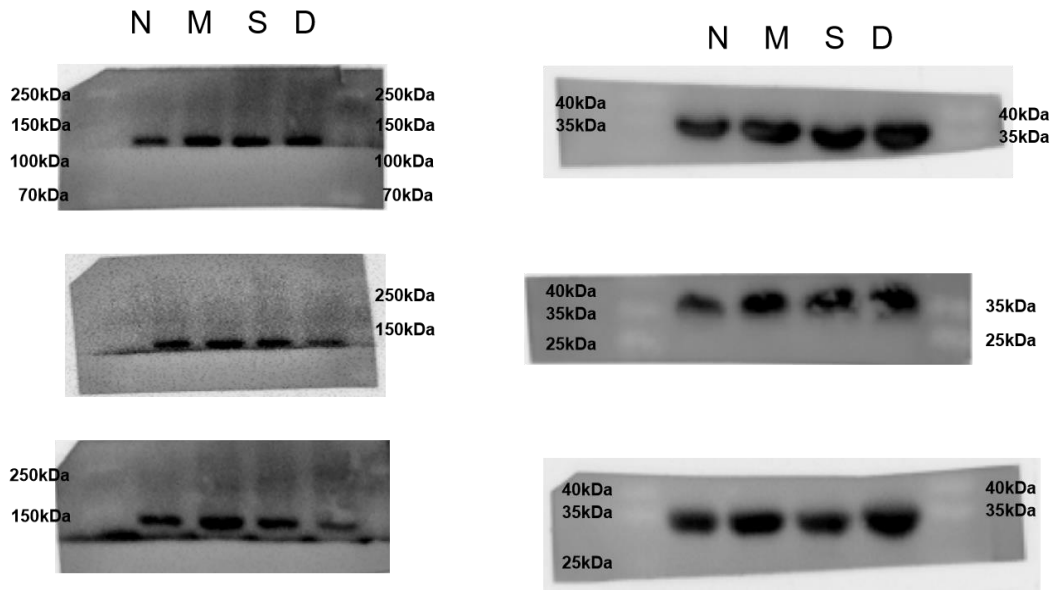

**2. Figure 3-panel B: WB analysis of COX-2 protein (left: COX -2; right: GAPDH)**

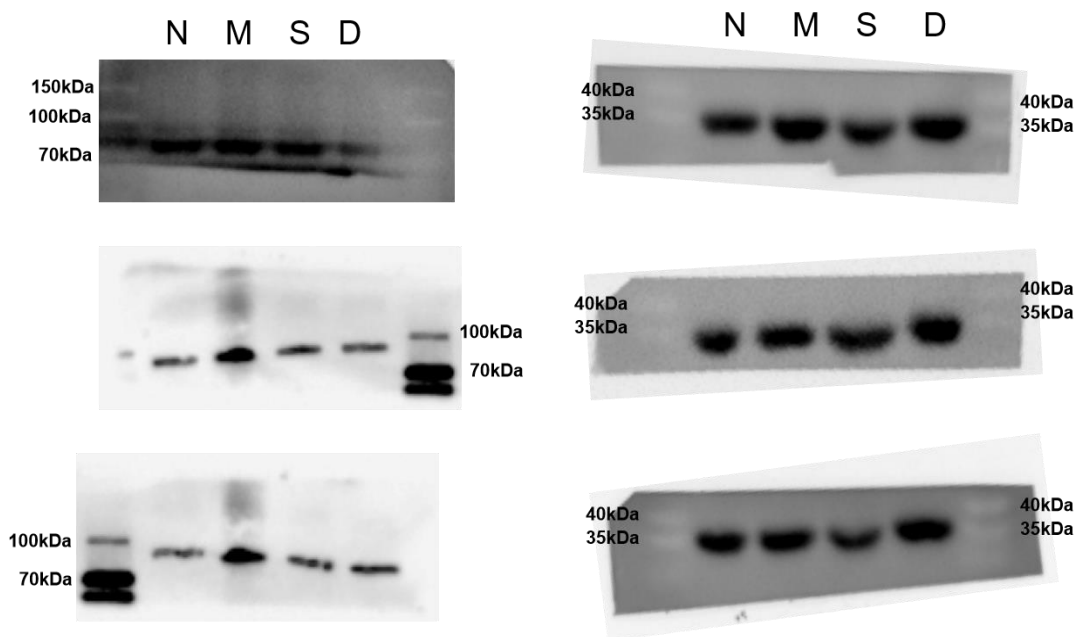

Supplement: DataSheet1.pdf [file DataSheet1.pdf]
